# Supplementary material for: Antimalarial artesunate–mefloquine versus praziquantel in African children with schistosomiasis: an open-label, randomized controlled trial
Source: PubMed Central journal article supplement (PMC10803269; doi:10.1038/s41591-023-02719-4), 2024-01-04
Supplement: 41591_2023_2719_MOESM1_ESM.pdf [file 41591_2023_2719_MOESM1_ESM.pdf]

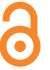

---

# **Antimalarial artesunate–mefloquine versus praziquantel in African children with schistosomiasis: an open-label, randomized controlled trial**

---

In the format provided by the authors and unedited

**Supplementary Table 1: Sensitivity analyses of cure rate in the artesunate-mefloquine arm versus the praziquantel arm at week 4 post-treatment, in the intention-to-treat (ITT) population**

A. Intention-to-treat analysis: on any available sample result

All subjects who were randomized were included in the ITT analysis populations. In cases where one of the two urine results, or any of the four stool results were missing, then the schistosomiasis status calculations were based only on the available samples.

| Species                   | Artesunate-mefloquine        | Praziquantel                 | Cure rate difference (95% CI) |
|---------------------------|------------------------------|------------------------------|-------------------------------|
| Both species pooled       |                              |                              |                               |
| Cure rate n/n (%; 95% CI) | 211 / 357 (59.1%; 53.9-64.1) | 215 / 351 (61.3%; 56.1-66.2) | -2.1% (-9.3 – 5.0)            |
| <i>S. haematobium</i>     |                              |                              |                               |
| Cure rate n/n (%; 95% CI) | 212 / 352 (60.2%; 55.0-65.2) | 217 / 351 (61.8%; 56.6-66.8) | -1.6% (-8.8 – 5.6)            |
| <i>S. mansoni</i>         |                              |                              |                               |
| Cure rate n/n (%; 95% CI) | 48 / 54 (88.9%; 77.8-94.8)   | 52 / 54 (96.3%; 87.5-99.0)   | -7.4% (-18.8 – 3.2)           |

B. Intention-to-treat analysis: on complete samples only

All randomized subjects were included in this analysis, excluding those that had any missing microscopy results.

| Species                   | Artesunate-mefloquine        | Praziquantel                 | Cure rate difference (95% CI) |
|---------------------------|------------------------------|------------------------------|-------------------------------|
| Both species pooled       |                              |                              |                               |
| Cure rate n/n (%; 95% CI) | 211 / 357 (59.1%; 53.9-64.1) | 214 / 350 (61.1%; 55.9-66.1) | -2.0% (-9.2 – 5.2)            |
| <i>S. haematobium</i>     |                              |                              |                               |
| Cure rate n/n (%; 95% CI) | 212 / 352 (60.2%; 55.0-65.2) | 216 / 350 (61.7%; 56.5-66.7) | -1.5% (-8.7 – 5.7)            |
| <i>S. mansoni</i>         |                              |                              |                               |
| Cure rate n/n (%; 95% CI) | 48 / 54 (88.9%; 77.8-94.8)   | 51 / 53 (96.2%; 87.2-99.0)   | -7.3% (-18.8 – 3.4)           |

C. Intention-to-treat analysis: best case scenario

All missing samples were considered as negative in the calculations of the cure rate.

| Species                   | Artesunate-mefloquine        | Praziquantel                 | Cure rate difference (95% CI) |
|---------------------------|------------------------------|------------------------------|-------------------------------|
| Both species pooled       |                              |                              |                               |
| Cure rate n/n (%; 95% CI) | 214 / 360 (59.4%; 54.3-64.4) | 221 / 357 (61.9%; 56.8-66.8) | -2.5% (-9.6 - 4.7)            |
| <i>S. haematobium</i>     |                              |                              |                               |
| Cure rate n/n (%; 95% CI) | 215 / 355 (60.6%; 55.4-65.5) | 223 / 357 (62.5%; 57.3-67.3) | -1.9% (-9.0 – 5.2)            |
| <i>S. mansoni</i>         |                              |                              |                               |
| Cure rate n/n (%; 95% CI) | 48 / 54 (88.9%; 77.8-94.8)   | 53 / 55 (96.4%; 87.7-99.0)   | -7.5% (-18.9 – 3.0)           |

D. Intention-to-treat analysis: worst case scenario

All missing samples were considered as positive in the calculations of the cure rate.

| Species                   | Artesunate-mefloquine        | Praziquantel                 | Cure rate difference (95% CI) |
|---------------------------|------------------------------|------------------------------|-------------------------------|
| Both species pooled       |                              |                              |                               |
| Cure rate n/n (%; 95% CI) | 211 / 360 (58.6%; 53.5-63.6) | 215 / 358 (60.1%; 54.9-65.0) | -1.4% (-8.6 – 5.7)            |
| <i>S. haematobium</i>     |                              |                              |                               |
| Cure rate n/n (%; 95% CI) | 212 / 355 (59.7%; 54.5-64.7) | 217 / 358 (60.6%; 55.5-65.5) | -0.9% (-8.0 – 6.3)            |
| <i>S. mansoni</i>         |                              |                              |                               |
| Cure rate n/n (%; 95% CI) | 50 / 56 (89.3%; 78.5-95.0)   | 53 / 57 (93.0%; 83.3-97.2)   | -3.7% (-15.3 – 7.5)           |

**Supplementary Table 2: Cure rates, using microscopic results, and cure rate difference and cure rate ratios between artesunate-mefloquine and praziquantel arms at the different study time points, per *Schistosoma* species and with both pooled species**

| Species               |         | Artesunate-mefloquine<br>Cured (cure rate; 95% CI) | Praziquantel<br>Cured (cure rate; 95% CI) | Cure rate difference<br>(95% CI) | Cure rate ratios<br>(95% CI) |
|-----------------------|---------|----------------------------------------------------|-------------------------------------------|----------------------------------|------------------------------|
| <i>S. haematobium</i> | Week 4  | 209 / 344 (0.608; 0.555-0.658)                     | 213 / 340 (0.626; 0.574-0.676)            | -0.019 (-0.091- 0.054)           | 0.97 (0.86-1.09)             |
|                       | Week 10 | 263 / 339 (0.776; 0.728-0.817)                     | 258 / 335 (0.770; 0.722-0.812)            | 0.006 (-0.058- 0.069)            | 1.01 (0.93-1.09)             |
|                       | Week 16 | 294 / 336 (0.875; 0.835-0.906)                     | 263 / 333 (0.790; 0.743-0.830)            | 0.085 (0.029- 0.142)             | 1.11 (1.03-1.19)             |
|                       | Week 24 | 274 / 318 (0.862; 0.819-0.895)                     | 253 / 325 (0.778; 0.730-0.820)            | 0.083 (0.024- 0.142)             | 1.11 (1.03-1.19)             |
|                       | Week 48 | 58 / 290 (0.200; 0.158-0.250)                      | 50 / 304 (0.164; 0.127-0.210)             | 0.036 (-0.027- 0.098)            | 1.22 (0.86-1.71)             |
| <i>S. mansoni</i>     | Week 4  | 48 / 54 (0.889; 0.778-0.948)                       | 50 / 52 (0.962; 0.870-0.989)              | -0.073 (-0.187- 0.036)           | 0.92 (0.83-1.03)             |
|                       | Week 10 | 49 / 53 (0.925; 0.821-0.970)                       | 50 / 52 (0.962; 0.870-0.989)              | -0.037 (-0.144- 0.065)           | 0.96 (0.87-1.06)             |
|                       | Week 16 | 51 / 52 (0.981; 0.899-0.997)                       | 51 / 52 (0.981; 0.899-0.997)              | 0.000 (-0.083- 0.083)            | 1.0 (0.95-1.05)              |

|        |         |                                |                                |                        |                    |
|--------|---------|--------------------------------|--------------------------------|------------------------|--------------------|
|        | Week 24 | 44 / 51 (0.863; 0.743-0.932)   | 47 / 52 (0.904; 0.794-0.958)   | -0.041 (-0.173- 0.089) | 0.95 (0.83-1.1)    |
|        | Week 48 | 28 / 48 (0.583; 0.443-0.712)   | 33 / 50 (0.660; 0.522-0.776)   | -0.077 (-0.259- 0.112) | 0.88 (0.64-1.19)   |
| Pooled | Week 4  | 208 / 349 (0.596; 0.544-0.646) | 211 / 340 (0.621; 0.568-0.671) | -0.025 (-0.097- 0.048) | 0.96 (0.85 - 1.08) |
|        | Week 10 | 262 / 343 (0.764; 0.716-0.806) | 255 / 335 (0.761; 0.713-0.804) | 0.003 (-0.061- 0.067)  | 1.0 (0.92 - 1.09)  |
|        | Week 16 | 297 / 340 (0.874; 0.834-0.905) | 261 / 333 (0.784; 0.736-0.825) | 0.090 (0.033- 0.146)   | 1.11 (1.04 - 1.19) |
|        | Week 24 | 270 / 322 (0.839; 0.794-0.875) | 246 / 325 (0.757; 0.707-0.800) | 0.082 (0.020- 0.143)   | 1.11 (1.02 - 1.2)  |
|        | Week 48 | 54 / 294 (0.184; 0.144-0.232)  | 48 / 304 (0.158; 0.121-0.203)  | 0.026 (-0.035- 0.086)  | 1.16 (0.82-1.66)   |

Note: CI denotes confidence interval; The ratios of cure rates were calculated per time point together with the Wald confidence interval.
